# Supplementary material for: From natural to synthetic hydrogels: how much biochemical complexity is required for mechanotransduction?
Source: Royal Society of Chemistry journal article supplement (doi:10.1039/d4tb01774a), 2024-11-27
Supplement: d4tb01774a1.pdf [file d4tb01774a1.pdf]

## Electronic Supplementary Information

### From natural to synthetic hydrogels: how much biochemical complexity is required for mechanotransduction?

Johnick F. van Sprang<sup>a,b,c</sup>, Imke P.M. Smits<sup>a,c</sup>, Jasper C.H. Nooten<sup>a,b</sup>, Peter-Paul P.K.H. Fransen<sup>a,b</sup>, Serge H.M. Söntjens<sup>d</sup>, Michel H.C.J. van Houtem<sup>d</sup>, Henk M. Janssen<sup>d</sup>, Martin G.T.A. Rutten<sup>a,b</sup>, Maaike J.G. Schotman<sup>a,b</sup>, and

---

<sup>a</sup> *Institute for Complex Molecular Systems, Eindhoven University of Technology, P.O. Box 513, 5600 MB Eindhoven, The Netherlands*

<sup>b</sup> *Laboratory of Chemical Biology, Department of Biomedical Engineering, Eindhoven University of Technology, P.O. Box 513, 5600 MB Eindhoven, The Netherlands*

<sup>c</sup> *Laboratory of Cell and Tissue Engineering, Department of Biomedical Engineering, Eindhoven University of Technology, P.O. Box 513, 5600 MB Eindhoven, The Netherlands*

<sup>d</sup> *SyMO-Chem B.V., Den Dolech 2, 5612 AZ Eindhoven, The Netherlands*

† Electronic Supplementary Information (ESI) available: [details of any supplementary information available should be included here]. See DOI: 10.1039/x0xx00000x

P.Y.W. Dankers<sup>a,b,c\*</sup>

**Table S1.** Overview of molecular ratios and hydrogel compositions

| Condition                            | Hydrogel wt% | Total concentration (mM) | UPy-Gly concentration (mM) | UPy-PEG concentration (mM) | UPy-HA concentration (mM) | UPy-cRGDFK concentration (mM) | UPy-RCP concentration (mM) | UPy-GFOGER concentration (mM) | UPy-Gly : UPy-PEG or UPy-HA : UPy additive mol percentages (%) |
|--------------------------------------|--------------|--------------------------|----------------------------|----------------------------|---------------------------|-------------------------------|----------------------------|-------------------------------|----------------------------------------------------------------|
| Synthetic hydrogel (1 mM UPy-cRGDFK) | 1.25         | 9                        | 7.9                        | 0.1                        | 0                         | 1                             | 0                          | 0                             | 88 : 1 : 11                                                    |
| Synthetic hydrogel (no additive)     | 2.5          | 19                       | 18.8                       | 0.2                        | 0                         | 0                             | 0                          | 0                             | 99 : 1 : n.a.                                                  |
| Synthetic hydrogel (1 mM UPy-cRGDFK) | 2.5          | 18.6                     | 17.4                       | 0.2                        | 0                         | 1                             | 0                          | 0                             | 93 : 1 : 6                                                     |
| Synthetic hydrogel (1 mM UPy-cRGDFK) | 5            | 27.9                     | 26.4                       | 0.5                        | 0                         | 1                             | 0                          | 0                             | 95 : 2 : 3                                                     |
| Hybrid hydrogel (no additive)        | 1.2          | 9.5                      | 9.4                        | 0                          | 0.03                      | 0                             | 0                          | 0                             | 99 : 1 : n.a.                                                  |
| Hybrid hydrogel (0.09 mM UPy-RCP)    | 1.42         | 9.5                      | 9.3                        | 0                          | 0.03                      | 0                             | 0.09                       | 0                             | 98 : 1 : 1                                                     |
| Hybrid hydrogel (no additive)        | 2.4          | 18.9                     | 18.8                       | 0                          | 0.06                      | 0                             | 0                          | 0                             | 99 : 1 : n.a.                                                  |
| Hybrid hydrogel (3 mM UPy-GFOGER)    | 3.38         | 18.9                     | 15.8                       | 0                          | 0.06                      | 0                             | 0                          | 3                             | 84 : 1 : 15                                                    |
| Hybrid hydrogel (0.09 mM UPy-RCP)    | 2.84         | 18.9                     | 18.7                       | 0                          | 0.06                      | 0                             | 0.09                       | 0                             | 98 : 1 : 1                                                     |
| Hybrid hydrogel (no additive)        | 4.8          | 37.7                     | 37.6                       | 0                          | 0.13                      | 0                             | 0                          | 0                             | 99 : 1 : n.a.                                                  |
| Hybrid hydrogel (0.09 mM UPy-RCP)    | 5.68         | 37.7                     | 37.5                       | 0                          | 0.13                      | 0                             | 0.09                       | 0                             | 99 : 1 : 1                                                     |

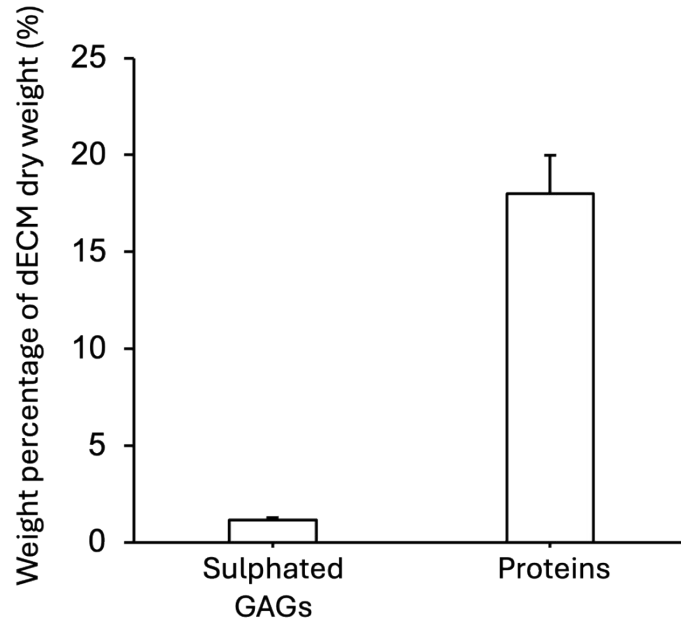

**Fig. S1** The dECM components as determined by percentage of colorimetric assay. The weight percentage of sulphated glycosaminoglycans (GAGs) and proteins relative to the dry dECM weight before gelation in buffer, as determined by a 1,9-dimethylmethylene blue assay and Bicinchoninic acid assay, respectively. Data are represented as mean  $\pm$  s.d., N = 3 technical replicates.
